# Supplementary material
Source: publisher figshare collection journal article supplement (https://gsajournals.figshare.com/articles/dataset/_/6071000)
Supplement: Supplementary file 1 [file 1]

## Sheet: Sheet1
Mutants and Controls
SRA Accession	Sample	Backcrossed into B73?	Reads	Data Type	Citation
SRX1304654	mop1-1_mut_R1	yes	25105056	RNA-seq	Li et al. 2015, PNAS
SRX1304655	mop1-1_mut_R2	yes	23993746	RNA-seq	Li et al. 2015, PNAS
SRX1304657	mop1-1_mut_R3	yes	22258732	RNA-seq	Li et al. 2015, PNAS
SRX1304659	Mop1_WT_R1	yes	23708017	RNA-seq	Li et al. 2015, PNAS
SRX1304660	Mop1_WT_R2	yes	26023097	RNA-seq	Li et al. 2015, PNAS
SRX1304661	Mop1_WT_R3	yes	24145350	RNA-seq	Li et al. 2015, PNAS
SRX1304662	mop3-1_mut_R1	no	25364193	RNA-seq	Li et al. 2015, PNAS
SRX1304663	mop3-1_mut_R2	no	24511848	RNA-seq	Li et al. 2015, PNAS
SRX1304665	mop3-1_mut_R3	no	25275443	RNA-seq	Li et al. 2015, PNAS
SRX1304666	Mop3_WT_R1	no	26095075	RNA-seq	Li et al. 2015, PNAS
SRX1304667	Mop3_WT_R2	no	28229361	RNA-seq	Li et al. 2015, PNAS
SRX1304668	Mop3_WT_R3	no	30221785	RNA-seq	Li et al. 2015, PNAS
SRX1099831	mop1-1EAR_mut_R1	yes	21412625	RNA-seq	Gent et al. 2014, Plant Cell
SRX1099832	mop1-1EAR_mut_R2	yes	11414130	RNA-seq	Gent et al. 2014, Plant Cell
SRX1099833	mop1-1EAR_mut_R3	yes	24293659	RNA-seq	Gent et al. 2014, Plant Cell
SRX708753	Mop1EAR_WT_R1	yes	20821254	RNA-seq	Gent et al. 2014, Plant Cell
SRX708779	Mop1EAR_WT_R2	yes	34043132	RNA-seq	Gent et al. 2014, Plant Cell
SRX708783	Mop1EAR_WT_R3	yes	12558325	RNA-seq	Gent et al. 2014, Plant Cell
SRX3224396	B73	NA	54054787	RNA-seq	This Study
SRX3224395	B73	NA	58164668	RNA-seq	This Study
SRX3224394	B73	NA	53817307	RNA-seq	This Study
SRX3224393	zmet2-m1/zmet2-m1	yes	60068052	RNA-seq	This Study
SRX3224400	zmet2-m1/zmet2-m1	yes	45349339	RNA-seq	This Study
SRX3224399	zmet2-m1/zmet2-m1	yes	53467127	RNA-seq	This Study
SRX3224398	zmet2-m2/zmet2-m2	yes	20956398	RNA-seq	This Study
SRX3224397	zmet2-m2/zmet2-m2	yes	21342104	RNA-seq	This Study
SRX3224402	zmet2-m2/zmet2-m2	yes	34939574	RNA-seq	This Study
SRX3224401	zmet5-m1/zmet5-m1	yes	59906982	RNA-seq	This Study
SRX3224404	zmet5-m1/zmet5-m1	yes	56062614	RNA-seq	This Study
SRX3224403	zmet5-m1/zmet5-m1	yes	49953383	RNA-seq	This Study
SRR2106180	wt_T0_R1	yes	58002105	RNA-seq	Forestan et al. 2017, BMC Plant Biol.
SRR2106196	wt_T0_R23	yes	39033244	RNA-seq	Forestan et al. 2017, BMC Plant Biol.
SRR2106188	rmr6-1_T0_R1	yes	40796488	RNA-seq	Forestan et al. 2017, BMC Plant Biol.
SRR2106204	rmr6-1_T0_R23	yes	36451221	RNA-seq	Forestan et al. 2017, BMC Plant Biol.
Natural Varation
SRA Accession	Sample	Reads	Data Type	Citation
SRR651049	B73 rep 1	13399149	RNA-seq	Eichten et al., 2013, Plant Cell
SRR651050	B73 rep 2	14152930	RNA-seq	Eichten et al., 2013, Plant Cell
SRR651051	B73 rep 3	19270220	RNA-seq	Eichten et al., 2013, Plant Cell
SRR651052	B97 rep 1	13884840	RNA-seq	Eichten et al., 2013, Plant Cell
SRR766777	B97_R2	25796328	RNA-seq	Eichten et al., 2013, Plant Cell
SRR766776	B97_R3	24503625	RNA-seq	Eichten et al., 2013, Plant Cell
SRR651057	CML322 rep 1	12775245	RNA-seq	Eichten et al., 2013, Plant Cell
SRR767717	CML322_R2	19471126	RNA-seq	Eichten et al., 2013, Plant Cell
SRR767716	CML322_R3	23053240	RNA-seq	Eichten et al., 2013, Plant Cell
SRR651060	Hp301 rep 1	16861363	RNA-seq	Eichten et al., 2013, Plant Cell
SRR767678	Hp301_R2	23492306	RNA-seq	Eichten et al., 2013, Plant Cell
SRR767679	Hp301_R3	25001232	RNA-seq	Eichten et al., 2013, Plant Cell
SRR651061	Il14h rep 1	12653042	RNA-seq	Eichten et al., 2013, Plant Cell
SRR651069	Mo17 rep 1	15801487	RNA-seq	Eichten et al., 2013, Plant Cell
SRR651070	Mo17 rep 2	17745280	RNA-seq	Eichten et al., 2013, Plant Cell
SRR651071	Mo17 rep 3	14336816	RNA-seq	Eichten et al., 2013, Plant Cell
SRR651077	Oh43 rep 1	11766590	RNA-seq	Eichten et al., 2013, Plant Cell
SRR651078	Oh43 rep 2	14922276	RNA-seq	Eichten et al., 2013, Plant Cell
SRR651079	Oh43 rep 3	18200539	RNA-seq	Eichten et al., 2013, Plant Cell
SRR651081	P39 rep 2	21748449	RNA-seq	Eichten et al., 2013, Plant Cell
SRR651082	Tx303 rep 1	17474393	RNA-seq	Eichten et al., 2013, Plant Cell
SRR767701	Tx303_R2	26313196	RNA-seq	Eichten et al., 2013, Plant Cell
SRR767702	Tx303_R3	25230109	RNA-seq	Eichten et al., 2013, Plant Cell
SRR651084	W22 rep 1	11254201	RNA-seq	Eichten et al., 2013, Plant Cell
Whole-genome bisulfite sequencing
SRA Accession	Genotype	Reads	Data type	Citation	conversion rate
SRR1583948, SRR1583949, SRR1583951	zmet2-m1	112855791	WGBS	Gent et al. 2014, Plant Cell	99.77
SRX3311640	A632	161519476	WGBS	This study	99.71
SRX3311639	B37	162284561	WGBS	This study	99.62
SRX3311635	LH123HT	204260159	WGBS	This study	99.73
SRX3311638	LH82	179811791	WGBS	This study	99.41
SRX1073654	PH207	381565504	WGBS	Li et al. 2015, PNAS	99.49
SRX3311633	PHG47	142955001	WGBS	This study	99.6
SRX3311632	PHJ40	166842734	WGBS	This study	99.56
SRX3311631	PHZ51	162557121	WGBS	This study	99.48
SRR850328	B73	167762882	WGBS	Li et al. 2015, Plant Physiol	99.0511
SRX3311642	B97	152577142	WGBS	This study	99.53
SRX731432	CML322	186299504	WGBS	Li et al. 2015, Plant Physiol	99.591
SRX3311641	HP301	216647361	WGBS	This study	99.69
SRX3311636	IL14	207448285	WGBS	This study	99.73
SRR850332	Mo17R1	143155853	WGBS	Li et al. 2015, Plant Physiol	99.0656
SRX731433	Oh43	160563110	WGBS	Li et al. 2015, Plant Physiol	99.4696
SRX3311634	P39	156289099	WGBS	This study	99.62
SRX731434	Tx303	169478899	WGBS	Li et al. 2015, Plant Physiol	99.6168
SRX3136383	W22	183670406	WGBS	Spinger et al., 2018, submitted	99.51
SRX3311637	Mo17R2	193924301	WGBS	This study	99.6
Developmental Atlases
SRA Accession	Sample	Data type	Development_cluster	Citation
SRR531200	Coleoptile_GH_6DAS_R1a	RNA-seq	Vegetative	Stelpflug et al. 2016, Plant Genome
SRR531202	Coleoptile_GH_6DAS_R2b	RNA-seq	Vegetative	Stelpflug et al. 2016, Plant Genome
SRR531204	Coleoptile_GH_6DAS_R3b	RNA-seq	Vegetative	Stelpflug et al. 2016, Plant Genome
SRR531206	Pooled_Leaves_V1_R1b	RNA-seq	Vegetative	Stelpflug et al. 2016, Plant Genome
SRR531208	Pooled_Leaves_V1_R2b	RNA-seq	Vegetative	Stelpflug et al. 2016, Plant Genome
SRR940236	Pooled_Leaves_V1_R3c	RNA-seq	Vegetative	Stelpflug et al. 2016, Plant Genome
SRR531211	Stem_and_SAM_V1_R1a	RNA-seq	Vegetative	Stelpflug et al. 2016, Plant Genome
SRR531212	Stem_and_SAM_V1_R1b	RNA-seq	Vegetative	Stelpflug et al. 2016, Plant Genome
SRR940258	Meiotic_Tassel_V18_R1b	RNA-seq	Reproductive	Stelpflug et al. 2016, Plant Genome
SRR940300	Whole_Seed_18DAP_R2b	RNA-seq	Endosperm & Late Seed	Stelpflug et al. 2016, Plant Genome
SRR531912	Whole_Seed_18DAP_R3	RNA-seq	Endosperm & Late Seed	Stelpflug et al. 2016, Plant Genome
SRR1619669	Leaf_0DAP_R1	RNA-seq	Vegetative	Stelpflug et al. 2016, Plant Genome
SRR1619670	Leaf_0DAP_R2	RNA-seq	Vegetative	Stelpflug et al. 2016, Plant Genome
SRR1619633	Leaf_6DAP_R1	RNA-seq	Vegetative	Stelpflug et al. 2016, Plant Genome
SRR1619634	Leaf_6DAP_R2	RNA-seq	Vegetative	Stelpflug et al. 2016, Plant Genome
SRR1619636	Leaf_12DAP_R1	RNA-seq	Vegetative	Stelpflug et al. 2016, Plant Genome
SRR1619637	Leaf_12DAP_R2	RNA-seq	Vegetative	Stelpflug et al. 2016, Plant Genome
SRR1619660	Leaf_18DAP_R1	RNA-seq	Vegetative	Stelpflug et al. 2016, Plant Genome
SRR1619661	Leaf_18DAP_R2	RNA-seq	Vegetative	Stelpflug et al. 2016, Plant Genome
SRR1619664	Leaf_24DAP_R1	RNA-seq	Vegetative	Stelpflug et al. 2016, Plant Genome
SRR1626426	Leaf_24DAP_R2	RNA-seq	Vegetative	Stelpflug et al. 2016, Plant Genome
SRR1619667	Leaf_30DAP_R1	RNA-seq	Vegetative	Stelpflug et al. 2016, Plant Genome
SRR1619668	Leaf_30DAP_R2	RNA-seq	Vegetative	Stelpflug et al. 2016, Plant Genome
SRR531913	Endosperm_18DAP_R1	RNA-seq	Endosperm & Late Seed	Stelpflug et al. 2016, Plant Genome
SRR531914	Endosperm_18DAP_R2	RNA-seq	Endosperm & Late Seed	Stelpflug et al. 2016, Plant Genome
SRR531915	Endosperm_18DAP_R3	RNA-seq	Endosperm & Late Seed	Stelpflug et al. 2016, Plant Genome
SRR531916	Embryo_18DAP_R1	RNA-seq	Embryo & Early Seed	Stelpflug et al. 2016, Plant Genome
SRR531917	Embryo_18DAP_R2	RNA-seq	Embryo & Early Seed	Stelpflug et al. 2016, Plant Genome
SRR531919	Embryo_18DAP_R3	RNA-seq	Embryo & Early Seed	Stelpflug et al. 2016, Plant Genome
SRR531920	Pericarp_18DAP_R2	RNA-seq	Vegetative	Stelpflug et al. 2016, Plant Genome
SRR531921	Pericarp_18DAP_R3	RNA-seq	Vegetative	Stelpflug et al. 2016, Plant Genome
SRR531922	Whole_Seed_20DAP_R1	RNA-seq	Endosperm & Late Seed	Stelpflug et al. 2016, Plant Genome
SRR531924	Whole_Seed_20DAP_R2	RNA-seq	Endosperm & Late Seed	Stelpflug et al. 2016, Plant Genome
SRR531925	Whole_Seed_20DAP_R3	RNA-seq	Endosperm & Late Seed	Stelpflug et al. 2016, Plant Genome
SRR531926	Endosperm_20DAP_R1	RNA-seq	Endosperm & Late Seed	Stelpflug et al. 2016, Plant Genome
SRR531928	Endosperm_20DAP_R2	RNA-seq	Endosperm & Late Seed	Stelpflug et al. 2016, Plant Genome
SRR531929	Endosperm_20DAP_R3	RNA-seq	Endosperm & Late Seed	Stelpflug et al. 2016, Plant Genome
SRR531930	Embryo_20DAP_R1	RNA-seq	Embryo & Early Seed	Stelpflug et al. 2016, Plant Genome
SRR531931	Embryo_20DAP_R2	RNA-seq	Embryo & Early Seed	Stelpflug et al. 2016, Plant Genome
SRR531932	Embryo_20DAP_R3	RNA-seq	Embryo & Early Seed	Stelpflug et al. 2016, Plant Genome
SRR531933	Whole_Seed_22DAP_R1	RNA-seq	Endosperm & Late Seed	Stelpflug et al. 2016, Plant Genome
SRR531934	Whole_Seed_22DAP_R2	RNA-seq	Endosperm & Late Seed	Stelpflug et al. 2016, Plant Genome
SRR531935	Whole_Seed_22DAP_R3	RNA-seq	Endosperm & Late Seed	Stelpflug et al. 2016, Plant Genome
SRR531936	Endosperm_22DAP_R1	RNA-seq	Endosperm & Late Seed	Stelpflug et al. 2016, Plant Genome
SRR531937	Endosperm_22DAP_R2	RNA-seq	Endosperm & Late Seed	Stelpflug et al. 2016, Plant Genome
SRR531938	Endosperm_22DAP_R3	RNA-seq	Endosperm & Late Seed	Stelpflug et al. 2016, Plant Genome
SRR531939	Embryo_22DAP_R1	RNA-seq	Embryo & Early Seed	Stelpflug et al. 2016, Plant Genome
SRR531940	Embryo_22DAP_R2	RNA-seq	Embryo & Early Seed	Stelpflug et al. 2016, Plant Genome
SRR531941	Embryo_22DAP_R3	RNA-seq	Embryo & Early Seed	Stelpflug et al. 2016, Plant Genome
SRR531942	Whole_Seed_24DAP_R1	RNA-seq	Endosperm & Late Seed	Stelpflug et al. 2016, Plant Genome
SRR531944	Whole_Seed_24DAP_R2	RNA-seq	Endosperm & Late Seed	Stelpflug et al. 2016, Plant Genome
SRR531945	Whole_Seed_24DAP_R3	RNA-seq	Endosperm & Late Seed	Stelpflug et al. 2016, Plant Genome
SRR531946	Endosperm_24DAP_R1	RNA-seq	Endosperm & Late Seed	Stelpflug et al. 2016, Plant Genome
SRR533828	Endosperm_24DAP_R2	RNA-seq	Endosperm & Late Seed	Stelpflug et al. 2016, Plant Genome
SRR533829	Endosperm_24DAP_R3	RNA-seq	Endosperm & Late Seed	Stelpflug et al. 2016, Plant Genome
SRR533835	Embryo_24DAP_R1	RNA-seq	Embryo & Early Seed	Stelpflug et al. 2016, Plant Genome
SRR533845	Embryo_24DAP_R2	RNA-seq	Embryo & Early Seed	Stelpflug et al. 2016, Plant Genome
SRR533848	Embryo_24DAP_R3	RNA-seq	Embryo & Early Seed	Stelpflug et al. 2016, Plant Genome
SRR531883	Meiotic_Tassel_V18_R2	RNA-seq	Reproductive	Stelpflug et al. 2016, Plant Genome
SRR531884	Meiotic_Tassel_V18_R3	RNA-seq	Reproductive	Stelpflug et al. 2016, Plant Genome
SRR531886	Immature_Cob_V18_R1	RNA-seq	Reproductive	Stelpflug et al. 2016, Plant Genome
SRR531887	Immature_Cob_V18_R2	RNA-seq	Reproductive	Stelpflug et al. 2016, Plant Genome
SRR531888	Immature_Cob_V18_R3	RNA-seq	Reproductive	Stelpflug et al. 2016, Plant Genome
SRR531889	Pre-pollination_Cob_R1_R1	RNA-seq	Vegetative	Stelpflug et al. 2016, Plant Genome
SRR531890	Pre-pollination_Cob_R1_R2	RNA-seq	Vegetative	Stelpflug et al. 2016, Plant Genome
SRR531891	Pre-pollination_Cob_R1_R3	RNA-seq	Vegetative	Stelpflug et al. 2016, Plant Genome
SRR531892	Silks_R1_R1	RNA-seq	Reproductive	Stelpflug et al. 2016, Plant Genome
SRR531893	Silks_R1_R2	RNA-seq	Reproductive	Stelpflug et al. 2016, Plant Genome
SRR531894	Silks_R1_R3	RNA-seq	Reproductive	Stelpflug et al. 2016, Plant Genome
SRR531895	Anthers_R1_R1	RNA-seq	Pollen&Anther	Stelpflug et al. 2016, Plant Genome
SRR531896	Anthers_R1_R2	RNA-seq	Pollen&Anther	Stelpflug et al. 2016, Plant Genome
SRR531897	Anthers_R1_R3	RNA-seq	Pollen&Anther	Stelpflug et al. 2016, Plant Genome
SRR531898	Whole_Seed_2DAP_R1	RNA-seq	Embryo & Early Seed	Stelpflug et al. 2016, Plant Genome
SRR531899	Whole_Seed_2DAP_R2	RNA-seq	Embryo & Early Seed	Stelpflug et al. 2016, Plant Genome
SRR531900	Whole_Seed_2DAP_R3	RNA-seq	Embryo & Early Seed	Stelpflug et al. 2016, Plant Genome
SRR531901	Whole_Seed_4DAP_R1	RNA-seq	Embryo & Early Seed	Stelpflug et al. 2016, Plant Genome
SRR531902	Whole_Seed_4DAP_R2	RNA-seq	Embryo & Early Seed	Stelpflug et al. 2016, Plant Genome
SRR531903	Whole_Seed_4DAP_R3	RNA-seq	Embryo & Early Seed	Stelpflug et al. 2016, Plant Genome
SRR531904	Whole_Seed_6DAP_R1	RNA-seq	Embryo & Early Seed	Stelpflug et al. 2016, Plant Genome
SRR531905	Whole_Seed_6DAP_R2	RNA-seq	Embryo & Early Seed	Stelpflug et al. 2016, Plant Genome
SRR531906	Whole_Seed_6DAP_R3	RNA-seq	Embryo & Early Seed	Stelpflug et al. 2016, Plant Genome
SRR531907	Whole_Seed_8DAP_R1	RNA-seq	Embryo & Early Seed	Stelpflug et al. 2016, Plant Genome
SRR531908	Whole_Seed_8DAP_R2	RNA-seq	Embryo & Early Seed	Stelpflug et al. 2016, Plant Genome
SRR531909	Whole_Seed_8DAP_R3	RNA-seq	Embryo & Early Seed	Stelpflug et al. 2016, Plant Genome
SRR531910	Whole_Seed_18DAP_R1	RNA-seq	Endosperm & Late Seed	Stelpflug et al. 2016, Plant Genome
SRR531213	Stem_and_SAM_V1_R2	RNA-seq	Vegetative	Stelpflug et al. 2016, Plant Genome
SRR531214	Stem_and_SAM_V1_R3	RNA-seq	Vegetative	Stelpflug et al. 2016, Plant Genome
SRR531215	primary_root_4dpe_rep1	RNA-seq	Roots	Stelpflug et al. 2016, Plant Genome
SRR531216	primary_root_4dpe_rep2	RNA-seq	Roots	Stelpflug et al. 2016, Plant Genome
SRR531217	primary_root_4dpe_rep3	RNA-seq	Roots	Stelpflug et al. 2016, Plant Genome
SRR531218	Topmost_Leaf_V3_R1	RNA-seq	Vegetative	Stelpflug et al. 2016, Plant Genome
SRR531219	Topmost_Leaf_V3_R2	RNA-seq	Vegetative	Stelpflug et al. 2016, Plant Genome
SRR531220	Topmost_Leaf_V3_R3	RNA-seq	Vegetative	Stelpflug et al. 2016, Plant Genome
SRR531221	Shoot_Tip_V5_R1	RNA-seq	Vegetative	Stelpflug et al. 2016, Plant Genome
SRR531222	Shoot_Tip_V5_R2	RNA-seq	Vegetative	Stelpflug et al. 2016, Plant Genome
SRR531223	Shoot_Tip_V5_R3	RNA-seq	Vegetative	Stelpflug et al. 2016, Plant Genome
SRR531224	First_Internode_V5_R1	RNA-seq	Vegetative	Stelpflug et al. 2016, Plant Genome
SRR531225	First_Internode_V5_R2	RNA-seq	Vegetative	Stelpflug et al. 2016, Plant Genome
SRR531226	First_Internode_V5_R3	RNA-seq	Vegetative	Stelpflug et al. 2016, Plant Genome
SRR531866	Base_Stage2_Leaf_V5_R1	RNA-seq	Vegetative	Stelpflug et al. 2016, Plant Genome
SRR531867	Base_Stage2_Leaf_V5_R2	RNA-seq	Vegetative	Stelpflug et al. 2016, Plant Genome
SRR531868	Base_Stage2_Leaf_V5_R3	RNA-seq	Vegetative	Stelpflug et al. 2016, Plant Genome
SRR531869	Tip_Stage2_Leaf_V7_R1	RNA-seq	Vegetative	Stelpflug et al. 2016, Plant Genome
SRR531870	Tip_Stage2_Leaf_V7_R2	RNA-seq	Vegetative	Stelpflug et al. 2016, Plant Genome
SRR531871	Tip_Stage2_Leaf_V7_R3	RNA-seq	Vegetative	Stelpflug et al. 2016, Plant Genome
SRR531872	Base_Stage2_Leaf_V7_R1	RNA-seq	Vegetative	Stelpflug et al. 2016, Plant Genome
SRR531873	Base_Stage2_Leaf_V7_R2	RNA-seq	Vegetative	Stelpflug et al. 2016, Plant Genome
SRR531874	Base_Stage2_Leaf_V7_R3	RNA-seq	Vegetative	Stelpflug et al. 2016, Plant Genome
SRR531875	Fourth_Internode_V9_R1	RNA-seq	Vegetative	Stelpflug et al. 2016, Plant Genome
SRR531876	Fourth_Internode_V9_R2	RNA-seq	Vegetative	Stelpflug et al. 2016, Plant Genome
SRR531877	Fourth_Internode_V9_R3	RNA-seq	Vegetative	Stelpflug et al. 2016, Plant Genome
SRR531878	Immature_Tassel_V13_R1	RNA-seq	Reproductive	Stelpflug et al. 2016, Plant Genome
SRR531879	Immature_Tassel_V13_R2	RNA-seq	Reproductive	Stelpflug et al. 2016, Plant Genome
SRR531880	Immature_Tassel_V13_R3	RNA-seq	Reproductive	Stelpflug et al. 2016, Plant Genome
SRR940237	Eighth_Leaf_V9_R1	RNA-seq	Vegetative	Stelpflug et al. 2016, Plant Genome
SRR940238	Eighth_Leaf_V9_R2	RNA-seq	Vegetative	Stelpflug et al. 2016, Plant Genome
SRR940239	Eighth_Leaf_V9_R3	RNA-seq	Vegetative	Stelpflug et al. 2016, Plant Genome
SRR940249	Eleventh_Leaf_V9_R1	RNA-seq	Vegetative	Stelpflug et al. 2016, Plant Genome
SRR940250	Eleventh_Leaf_V9_R2	RNA-seq	Vegetative	Stelpflug et al. 2016, Plant Genome
SRR940251	Eleventh_Leaf_V9_R3	RNA-seq	Vegetative	Stelpflug et al. 2016, Plant Genome
SRR940252	Thirteenth_Leaf_V9_R1	RNA-seq	Vegetative	Stelpflug et al. 2016, Plant Genome
SRR940253	Thirteenth_Leaf_V9_R2	RNA-seq	Vegetative	Stelpflug et al. 2016, Plant Genome
SRR940254	Thirteenth_Leaf_V9_R3	RNA-seq	Vegetative	Stelpflug et al. 2016, Plant Genome
SRR940255	Immature_Leaves_V9_R1	RNA-seq	Vegetative	Stelpflug et al. 2016, Plant Genome
SRR940256	Immature_Leaves_V9_R2	RNA-seq	Vegetative	Stelpflug et al. 2016, Plant Genome
SRR940257	Immature_Leaves_V9_R3	RNA-seq	Vegetative	Stelpflug et al. 2016, Plant Genome
SRR940259	Thirteenth_Leaf_VT_R1	RNA-seq	Vegetative	Stelpflug et al. 2016, Plant Genome
SRR940260	Thirteenth_Leaf_VT_R2	RNA-seq	Vegetative	Stelpflug et al. 2016, Plant Genome
SRR940274	Thirteenth_Leaf_VT_R3	RNA-seq	Vegetative	Stelpflug et al. 2016, Plant Genome
SRR940276	Thirteenth_Leaf_R2_R1	RNA-seq	Vegetative	Stelpflug et al. 2016, Plant Genome
SRR940278	Thirteenth_Leaf_R2_R2	RNA-seq	Vegetative	Stelpflug et al. 2016, Plant Genome
SRR940279	Thirteenth_Leaf_R2_R3	RNA-seq	Vegetative	Stelpflug et al. 2016, Plant Genome
SRR404179	Whole_Seed_10DAP_R1	RNA-seq	Embryo & Early Seed	Stelpflug et al. 2016, Plant Genome
SRR940280	Whole_Seed_10DAP_R2	RNA-seq	Embryo & Early Seed	Stelpflug et al. 2016, Plant Genome
SRR940281	Whole_Seed_10DAP_R3	RNA-seq	Embryo & Early Seed	Stelpflug et al. 2016, Plant Genome
SRR940283	Whole_Seed_12DAP_R1	RNA-seq	Endosperm & Late Seed	Stelpflug et al. 2016, Plant Genome
SRR940284	Whole_Seed_12DAP_R2	RNA-seq	Endosperm & Late Seed	Stelpflug et al. 2016, Plant Genome
SRR940286	Whole_Seed_12DAP_R3	RNA-seq	Endosperm & Late Seed	Stelpflug et al. 2016, Plant Genome
SRR940287	Endosperm_12DAP_R1	RNA-seq	Endosperm & Late Seed	Stelpflug et al. 2016, Plant Genome
SRR940289	Endosperm_12DAP_R2	RNA-seq	Endosperm & Late Seed	Stelpflug et al. 2016, Plant Genome
SRR404187	Endosperm_12DAP_R3	RNA-seq	Endosperm & Late Seed	Stelpflug et al. 2016, Plant Genome
SRR940290	Whole_Seed_14DAP_R2	RNA-seq	Endosperm & Late Seed	Stelpflug et al. 2016, Plant Genome
SRR940291	Whole_Seed_14DAP_R3	RNA-seq	Endosperm & Late Seed	Stelpflug et al. 2016, Plant Genome
SRR940292	Endosperm_14DAP_R1	RNA-seq	Endosperm & Late Seed	Stelpflug et al. 2016, Plant Genome
SRR404192	Endosperm_14DAP_R2	RNA-seq	Endosperm & Late Seed	Stelpflug et al. 2016, Plant Genome
SRR404193	Endosperm_14DAP_R3	RNA-seq	Endosperm & Late Seed	Stelpflug et al. 2016, Plant Genome
SRR404194	Whole_Seed_16DAP_R1	RNA-seq	Endosperm & Late Seed	Stelpflug et al. 2016, Plant Genome
SRR940293	Whole_Seed_16DAP_R2	RNA-seq	Endosperm & Late Seed	Stelpflug et al. 2016, Plant Genome
SRR404196	Whole_Seed_16DAP_R3	RNA-seq	Endosperm & Late Seed	Stelpflug et al. 2016, Plant Genome
SRR940294	Endosperm_16DAP_R1	RNA-seq	Endosperm & Late Seed	Stelpflug et al. 2016, Plant Genome
SRR940295	Endosperm_16DAP_R2	RNA-seq	Endosperm & Late Seed	Stelpflug et al. 2016, Plant Genome
SRR940296	Endosperm_16DAP_R3	RNA-seq	Endosperm & Late Seed	Stelpflug et al. 2016, Plant Genome
SRR940297	Embryo_16DAP_R1	RNA-seq	Embryo & Early Seed	Stelpflug et al. 2016, Plant Genome
SRR940298	Embryo_16DAP_R2	RNA-seq	Embryo & Early Seed	Stelpflug et al. 2016, Plant Genome
SRR940299	Embryo_16DAP_R3	RNA-seq	Embryo & Early Seed	Stelpflug et al. 2016, Plant Genome
SRR1620828	Internode_6DAP_R2a	RNA-seq	Vegetative	Stelpflug et al. 2016, Plant Genome
SRR1620914	Internode_6DAP_R1a	RNA-seq	Vegetative	Stelpflug et al. 2016, Plant Genome
SRR1620932	Crown_Roots_Node5_V7_R1b	RNA-seq	Roots	Stelpflug et al. 2016, Plant Genome
SRR1620934	Primary_Root_Z1_7DAS_R1b	RNA-seq	Roots	Stelpflug et al. 2016, Plant Genome
SRR1620936	Primary_Root_Z1_7DAS_R3b	RNA-seq	Roots	Stelpflug et al. 2016, Plant Genome
SRR1620961	Primary_Root_3DAS_R1a	RNA-seq	Roots	Stelpflug et al. 2016, Plant Genome
SRR1633397	Primary_Root_3DAS_R2b	RNA-seq	Roots	Stelpflug et al. 2016, Plant Genome
SRR1620966	Primary_Root_7DAS_R2b	RNA-seq	Roots	Stelpflug et al. 2016, Plant Genome
SRR1620977	Crown_Roots_Node4_V7_R2b	RNA-seq	Roots	Stelpflug et al. 2016, Plant Genome
SRR1620991	Crown_Roots_Nodes1-3_V7_R3b	RNA-seq	Roots	Stelpflug et al. 2016, Plant Genome
SRR1620992	Crown_Roots_Node4_V7_R3a	RNA-seq	Roots	Stelpflug et al. 2016, Plant Genome
SRR1621015	Brace_Roots_Node6_V13_R2b	RNA-seq	Roots	Stelpflug et al. 2016, Plant Genome
SRR1620838	Internode_12DAP_R1	RNA-seq	Vegetative	Stelpflug et al. 2016, Plant Genome
SRR1620839	Internode_12DAP_R2	RNA-seq	Vegetative	Stelpflug et al. 2016, Plant Genome
SRR1620843	Internode_0DAP_R2	RNA-seq	Vegetative	Stelpflug et al. 2016, Plant Genome
SRR1620846	Internode_18DAP_R1	RNA-seq	Vegetative	Stelpflug et al. 2016, Plant Genome
SRR1620847	Internode_18DAP_R2	RNA-seq	Vegetative	Stelpflug et al. 2016, Plant Genome
SRR1620903	Internode_24DAP_R1	RNA-seq	Vegetative	Stelpflug et al. 2016, Plant Genome
SRR1620904	Internode_24DAP_R2	RNA-seq	Vegetative	Stelpflug et al. 2016, Plant Genome
SRR1620909	Internode_30DAP_R1	RNA-seq	Vegetative	Stelpflug et al. 2016, Plant Genome
SRR1620910	Internode_30DAP_R2	RNA-seq	Vegetative	Stelpflug et al. 2016, Plant Genome
SRR1620915	Internode_0DAP_R1	RNA-seq	Vegetative	Stelpflug et al. 2016, Plant Genome
SRR1620916	Primary_Root_Z4_7DAS_R2	RNA-seq	Roots	Stelpflug et al. 2016, Plant Genome
SRR1620917	Root_CP_3DAS_R2	RNA-seq	Roots	Stelpflug et al. 2016, Plant Genome
SRR1620918	Primary_Root_Z3_7DAS_R1	RNA-seq	Roots	Stelpflug et al. 2016, Plant Genome
SRR1620919	Primary_Root_Z2_7DAS_R3	RNA-seq	Roots	Stelpflug et al. 2016, Plant Genome
SRR1620920	Root_Stele_R1	RNA-seq	Roots	Stelpflug et al. 2016, Plant Genome
SRR1620921	Primary_Root_Z2_7DAS_R1	RNA-seq	Roots	Stelpflug et al. 2016, Plant Genome
SRR1620922	Primary_Root_Z1_7DAS_R2	RNA-seq	Roots	Stelpflug et al. 2016, Plant Genome
SRR1620923	Primary_Root_Z3_7DAS_R3	RNA-seq	Roots	Stelpflug et al. 2016, Plant Genome
SRR1620924	Primary_Root_Z3_7DAS_R2	RNA-seq	Roots	Stelpflug et al. 2016, Plant Genome
SRR1620925	Primary_Root_Z4_7DAS_R3	RNA-seq	Roots	Stelpflug et al. 2016, Plant Genome
SRR1620926	Primary_Root_Z4_7DAS_R1	RNA-seq	Roots	Stelpflug et al. 2016, Plant Genome
SRR1620928	Primary_Root_Z2_7DAS_R2	RNA-seq	Roots	Stelpflug et al. 2016, Plant Genome
SRR1620937	Root_Stele_R3	RNA-seq	Roots	Stelpflug et al. 2016, Plant Genome
SRR1620938	Root_Stele_R2	RNA-seq	Roots	Stelpflug et al. 2016, Plant Genome
SRR1620939	Root_CP_3DAS_R3	RNA-seq	Roots	Stelpflug et al. 2016, Plant Genome
SRR1620940	Root_CP_3DAS_R1	RNA-seq	Roots	Stelpflug et al. 2016, Plant Genome
SRR1620950	Pericarp_18DAP_R1	RNA-seq	Vegetative	Stelpflug et al. 2016, Plant Genome
SRR1620952	Root_DZ_3DAS_R1	RNA-seq	Roots	Stelpflug et al. 2016, Plant Genome
SRR1620953	Root_System_7DAS_R2	RNA-seq	Roots	Stelpflug et al. 2016, Plant Genome
SRR1620954	Seminal_Roots_7DAS_R3	RNA-seq	Roots	Stelpflug et al. 2016, Plant Genome
SRR1620955	Root_MZ_and_EZ_3DAS_R2	RNA-seq	Roots	Stelpflug et al. 2016, Plant Genome
SRR1620956	Root_DZ_3DAS_R3	RNA-seq	Roots	Stelpflug et al. 2016, Plant Genome
SRR1620957	Root_System_7DAS_R1	RNA-seq	Roots	Stelpflug et al. 2016, Plant Genome
SRR1620959	Primary_Root_7DAS_R3	RNA-seq	Roots	Stelpflug et al. 2016, Plant Genome
SRR1620960	Primary_Root_3DAS_R3	RNA-seq	Roots	Stelpflug et al. 2016, Plant Genome
SRR1620967	Seminal_Roots_7DAS_R1	RNA-seq	Roots	Stelpflug et al. 2016, Plant Genome
SRR1620968	Root_MZ_and_EZ_3DAS_R1	RNA-seq	Roots	Stelpflug et al. 2016, Plant Genome
SRR1620969	Seminal_Roots_7DAS_R2	RNA-seq	Roots	Stelpflug et al. 2016, Plant Genome
SRR1620971	Root_System_7DAS_R3	RNA-seq	Roots	Stelpflug et al. 2016, Plant Genome
SRR1620972	Root_MZ_and_EZ_3DAS_R3	RNA-seq	Roots	Stelpflug et al. 2016, Plant Genome
SRR1620973	Primary_Root_7DAS_R1	RNA-seq	Roots	Stelpflug et al. 2016, Plant Genome
SRR1620974	Root_DZ_3DAS_R2	RNA-seq	Roots	Stelpflug et al. 2016, Plant Genome
SRR1620975	Crown_Roots_Node4_V7_R1	RNA-seq	Roots	Stelpflug et al. 2016, Plant Genome
SRR1620987	Crown_Roots_Node5_V13_R1	RNA-seq	Roots	Stelpflug et al. 2016, Plant Genome
SRR1620988	Brace_Roots_Node6_V13_R1	RNA-seq	Roots	Stelpflug et al. 2016, Plant Genome
SRR1620989	Crown_Roots_Nodes1-3_V7_R1	RNA-seq	Roots	Stelpflug et al. 2016, Plant Genome
SRR1621016	Crown_Roots_Node5_V13_R3	RNA-seq	Roots	Stelpflug et al. 2016, Plant Genome
SRR1621017	Brace_Roots_Node6_V13_R3	RNA-seq	Roots	Stelpflug et al. 2016, Plant Genome
SRR1621018	Crown_Roots_Node5_V13_R2	RNA-seq	Roots	Stelpflug et al. 2016, Plant Genome
SRR1621019	Crown_Roots_Node5_V7_R2	RNA-seq	Roots	Stelpflug et al. 2016, Plant Genome
SRR1620941	Primary_Root_GH_6DAS_R1	RNA-seq	Roots	Stelpflug et al. 2016, Plant Genome
SRR1620942	Primary_Root_GH_6DAS_R2	RNA-seq	Roots	Stelpflug et al. 2016, Plant Genome
SRR1620943	Primary_Root_GH_6DAS_R3	RNA-seq	Roots	Stelpflug et al. 2016, Plant Genome
SRR1620944	Stem_and_SAM_V3_R1	RNA-seq	Vegetative	Stelpflug et al. 2016, Plant Genome
SRR1620945	Stem_and_SAM_V3_R2	RNA-seq	Vegetative	Stelpflug et al. 2016, Plant Genome
SRR1620946	Stem_and_SAM_V3_R3	RNA-seq	Vegetative	Stelpflug et al. 2016, Plant Genome
SRR1620947	Tip_Stage2_Leaf_V5_R1	RNA-seq	Vegetative	Stelpflug et al. 2016, Plant Genome
SRR1620948	Tip_Stage2_Leaf_V5_R2	RNA-seq	Vegetative	Stelpflug et al. 2016, Plant Genome
SRR1620949	Tip_Stage2_Leaf_V5_R3	RNA-seq	Vegetative	Stelpflug et al. 2016, Plant Genome
SRR957415	endo_12d1	RNA-seq	Endosperm & Late Seed	Walley et al. 2016, Science
SRR957416	endo_12d2	RNA-seq	Endosperm & Late Seed	Walley et al. 2016, Science
SRR957417	endo_12d3	RNA-seq	Endosperm & Late Seed	Walley et al. 2016, Science
SRR957418	peri_aleurone1	RNA-seq	Endosperm & Late Seed	Walley et al. 2016, Science
SRR957419	peri_aleurone2	RNA-seq	Endosperm & Late Seed	Walley et al. 2016, Science
SRR957420	peri_aleurone3	RNA-seq	Endosperm & Late Seed	Walley et al. 2016, Science
SRR957421	endocrown1	RNA-seq	Endosperm & Late Seed	Walley et al. 2016, Science
SRR957422	endocrown2	RNA-seq	Endosperm & Late Seed	Walley et al. 2016, Science
SRR957423	endocrown3	RNA-seq	Endosperm & Late Seed	Walley et al. 2016, Science
SRR957424	symdivz1	RNA-seq	Vegetative	Walley et al. 2016, Science
SRR957425	symdivz2	RNA-seq	Vegetative	Walley et al. 2016, Science
SRR957426	symdivz3	RNA-seq	Vegetative	Walley et al. 2016, Science
SRR957427	stodivz1	RNA-seq	Vegetative	Walley et al. 2016, Science
SRR957428	stodivz2	RNA-seq	Vegetative	Walley et al. 2016, Science
SRR957429	stodivz3	RNA-seq	Vegetative	Walley et al. 2016, Science
SRR957430	groz1	RNA-seq	Vegetative	Walley et al. 2016, Science
SRR957431	groz2	RNA-seq	Vegetative	Walley et al. 2016, Science
SRR957432	groz3	RNA-seq	Vegetative	Walley et al. 2016, Science
SRR957433	emb_20d1	RNA-seq	Embryo & Early Seed	Walley et al. 2016, Science
SRR957434	emb_20d2	RNA-seq	Embryo & Early Seed	Walley et al. 2016, Science
SRR957435	emb_20d3	RNA-seq	Embryo & Early Seed	Walley et al. 2016, Science
SRR957436	embryo1	RNA-seq	Embryo & Early Seed	Walley et al. 2016, Science
SRR957437	embryo2	RNA-seq	Embryo & Early Seed	Walley et al. 2016, Science
SRR957438	embryo3	RNA-seq	Embryo & Early Seed	Walley et al. 2016, Science
SRR957439	germk1	RNA-seq	Embryo & Early Seed	Walley et al. 2016, Science
SRR957440	germk2	RNA-seq	Embryo & Early Seed	Walley et al. 2016, Science
SRR957441	germk3	RNA-seq	Embryo & Early Seed	Walley et al. 2016, Science
SRR957442	leaf_81	RNA-seq	Vegetative	Walley et al. 2016, Science
SRR957443	leaf_82	RNA-seq	Vegetative	Walley et al. 2016, Science
SRR957444	leaf_83	RNA-seq	Vegetative	Walley et al. 2016, Science
SRR957445	earp_6m1	RNA-seq	Reproductive	Walley et al. 2016, Science
SRR957446	earp_6m2	RNA-seq	Reproductive	Walley et al. 2016, Science
SRR957447	earp_6m3	RNA-seq	Reproductive	Walley et al. 2016, Science
SRR957448	earp_2m1	RNA-seq	Reproductive	Walley et al. 2016, Science
SRR957449	earp_2m2	RNA-seq	Reproductive	Walley et al. 2016, Science
SRR957450	earp_2m3	RNA-seq	Reproductive	Walley et al. 2016, Science
SRR957451	root_m1	RNA-seq	Roots	Walley et al. 2016, Science
SRR957454	root_m2	RNA-seq	Roots	Walley et al. 2016, Science
SRR957457	root_m3	RNA-seq	Roots	Walley et al. 2016, Science
SRR957452	root_e1	RNA-seq	Roots	Walley et al. 2016, Science
SRR957455	root_e2	RNA-seq	Roots	Walley et al. 2016, Science
SRR957458	root_e3	RNA-seq	Roots	Walley et al. 2016, Science
SRR957453	root_c1	RNA-seq	Roots	Walley et al. 2016, Science
SRR957456	root_c2	RNA-seq	Roots	Walley et al. 2016, Science
SRR957459	root_c3	RNA-seq	Roots	Walley et al. 2016, Science
SRR957460	p_root1	RNA-seq	Roots	Walley et al. 2016, Science
SRR957461	p_root2	RNA-seq	Roots	Walley et al. 2016, Science
SRR957462	p_root3	RNA-seq	Roots	Walley et al. 2016, Science
SRR957463	s_root1	RNA-seq	Roots	Walley et al. 2016, Science
SRR957464	s_root2	RNA-seq	Roots	Walley et al. 2016, Science
SRR957465	s_root3	RNA-seq	Roots	Walley et al. 2016, Science
SRR957466	pollen1	RNA-seq	Pollen&Anther	Walley et al. 2016, Science
SRR957467	pollen2	RNA-seq	Pollen&Anther	Walley et al. 2016, Science
SRR957468	pollen3	RNA-seq	Pollen&Anther	Walley et al. 2016, Science
SRR957469	silk1	RNA-seq	Reproductive	Walley et al. 2016, Science
SRR957470	silk2	RNA-seq	Reproductive	Walley et al. 2016, Science
SRR957471	silk3	RNA-seq	Reproductive	Walley et al. 2016, Science
SRR957472	f_spike1	RNA-seq	Reproductive	Walley et al. 2016, Science
SRR957473	f_spike2	RNA-seq	Reproductive	Walley et al. 2016, Science
SRR957474	f_spike3	RNA-seq	Reproductive	Walley et al. 2016, Science
SRR957475	inode_6_1	RNA-seq	Vegetative	Walley et al. 2016, Science
SRR957476	inode_6_2	RNA-seq	Vegetative	Walley et al. 2016, Science
SRR957477	inode_6_3	RNA-seq	Vegetative	Walley et al. 2016, Science
SRR957478	inode_7_1	RNA-seq	Vegetative	Walley et al. 2016, Science
SRR957479	inode_7_2	RNA-seq	Vegetative	Walley et al. 2016, Science
SRR957480	inode_7_3	RNA-seq	Vegetative	Walley et al. 2016, Science
SRR957481	meristem1	RNA-seq	Vegetative	Walley et al. 2016, Science
SRR957482	meristem2	RNA-seq	Vegetative	Walley et al. 2016, Science
